# Supplementary material for: Efficient Entrapment of Alpha-Synuclein Biotinylated Antibody in KCC-1-NH-CS2 and Application for the Sensitive Diagnosis of Parkinson’s Using Recognition of Biomarker: An Innovative Electrochemical Label-Free Immunosensor for the Biomedical Analysis of Neurodegenerative Diseases
Source: MDPI journal article supplement (doi:10.3390/bios12100911), 2022-10-21
Supplement: s1 [file s1]

## Supporting information

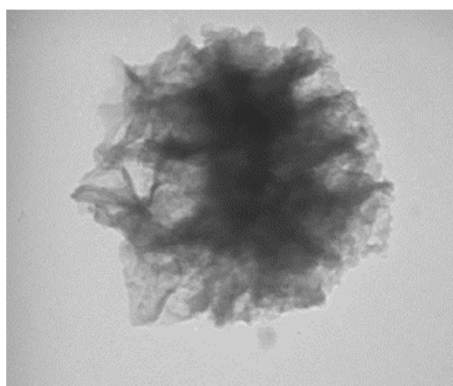

**Figure S1.** TEM graphs of KCC-1-NH-CS<sub>2</sub> in various magnifications.

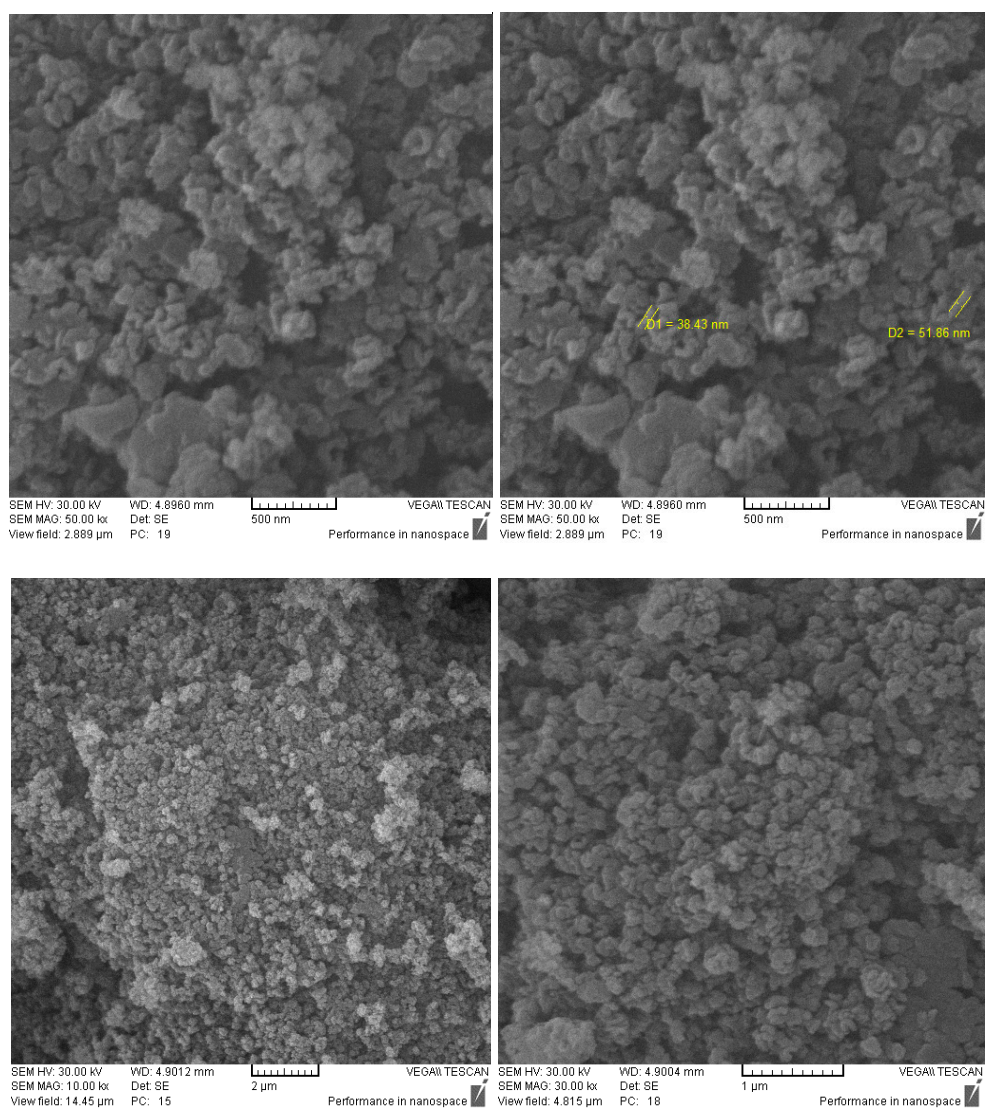

**Figure S2.** FESEM graphs of KCC-1-NH-CS<sub>2</sub> (C).

Finally, EDAX was carried out for tracing of expected elements in KCC-1, KCC-1-NH<sub>2</sub>, and KCC-1-NH-CS<sub>2</sub>. As shown in Fig. S3A, KCC-1 mainly consists of O and Si. Functionalizing KCC-1 with NH<sub>2</sub> and after that with CS<sub>2</sub>, N elements and S elements increased respectively, which proved the formation of KCC-1-NH-CS<sub>2</sub>. The FTIR spectra of KCC-1 and KCC-1-NH-CS<sub>2</sub> are shown in Fig. S3B. The characteristic peaks of the KCC-1 appear at 802 and 1100  $\mu\text{m}^{-1}$  correspond to the symmetric and asymmetric stretching vibrations of the Si-O-Si bond, respectively. New peaks have been observed in the KCC-1-NH-CS<sub>2</sub> spectrum at 1626  $\text{cm}^{-1}$  (deformation NH<sub>2</sub>), 2520  $\text{cm}^{-1}$  (stretching vibration of S-H in mercaptan groups), 2890  $\text{cm}^{-1}$  (stretching vibration of aliphatic C-H), and 3400  $\text{cm}^{-1}$  (vibration of N-H bond), which confirm the presence of the related functional groups and proves the successful modification of the KCC-1 surface.

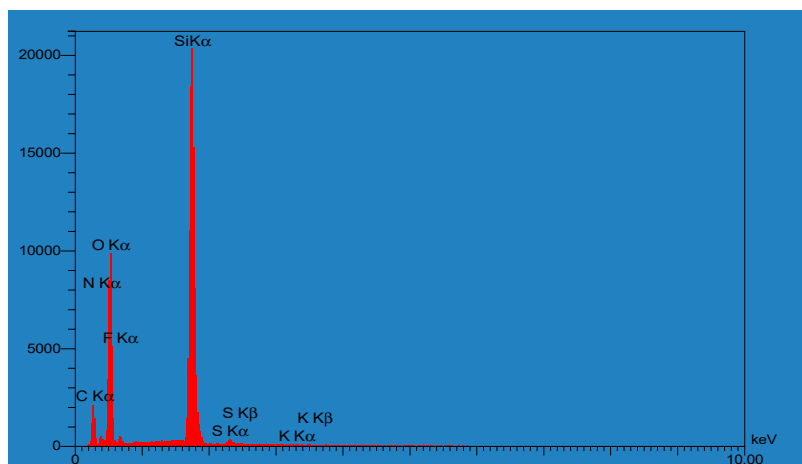

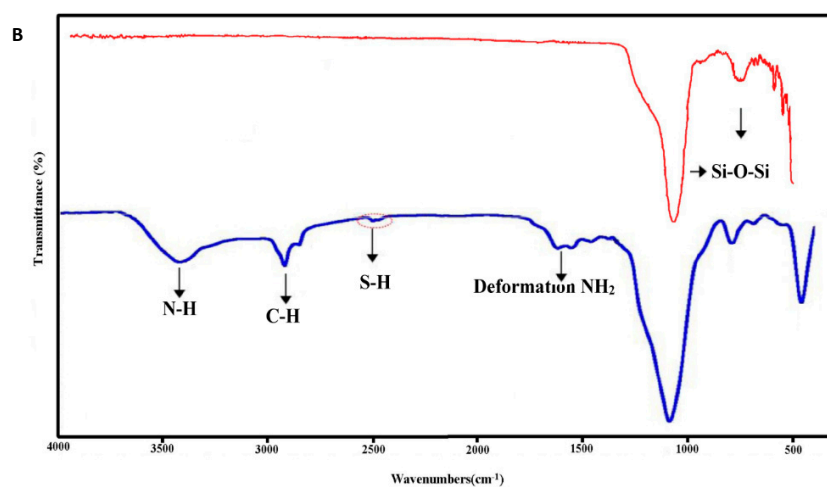

**Figure S3.** A) EDAX analyses of KCC-1, KCC-1- $\text{NH}_2$  and KCC-1- $\text{NH-CS}_2$ . B) FTIR spectra of KCC-1 and KCC-1- $\text{NH-CS}_2$ .

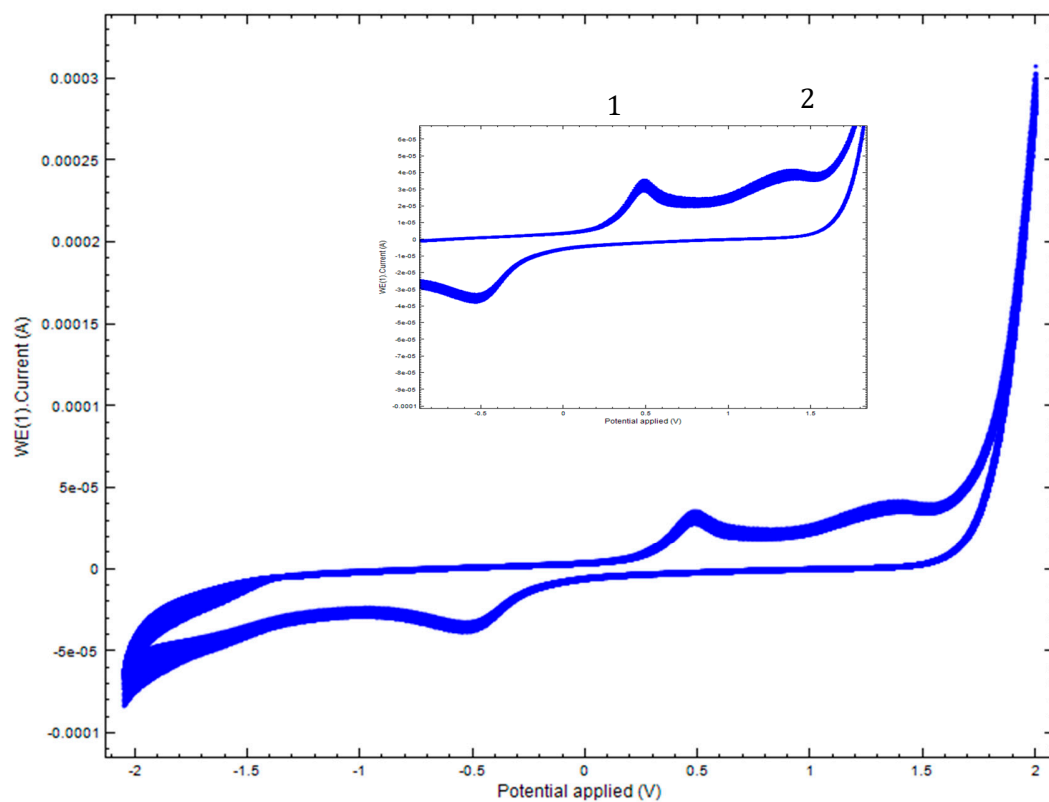

**Figure S4.** A) Electropolymerization of 6 mM  $\beta$ -CD in 0.05 M PBS (pH=4) as a supporting electrolyte on the surface of GCE. The cyclic voltammogram depicts gradual growth of  $\beta$ -CD after 40 successive cycles in the range of -2 to +2 V vs. Ag/AgCl with a scan rate of 0.07 V/s. Inset: three current peaks of  $\beta$ -CD electropolymerization.



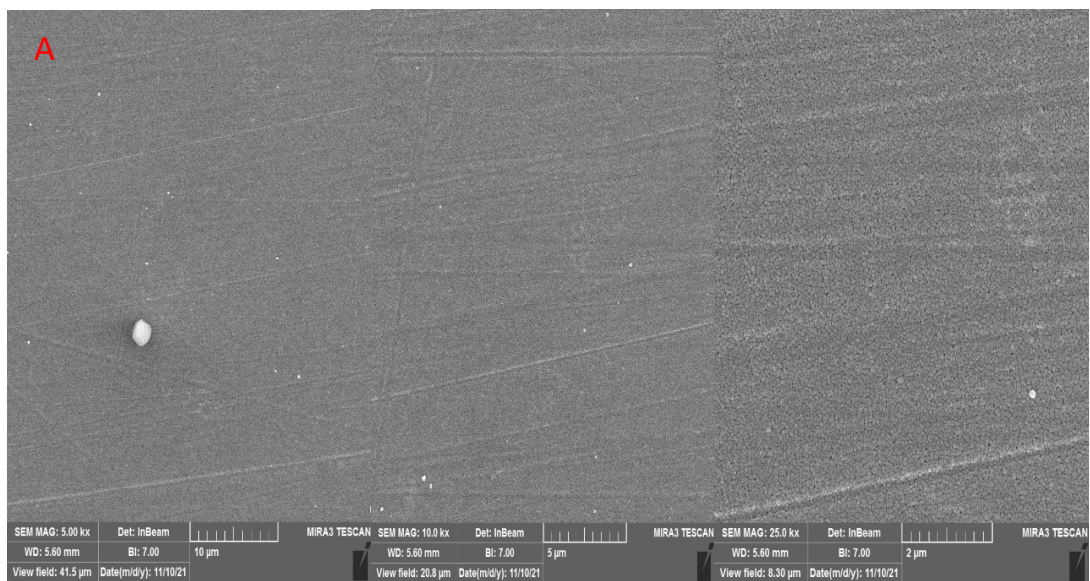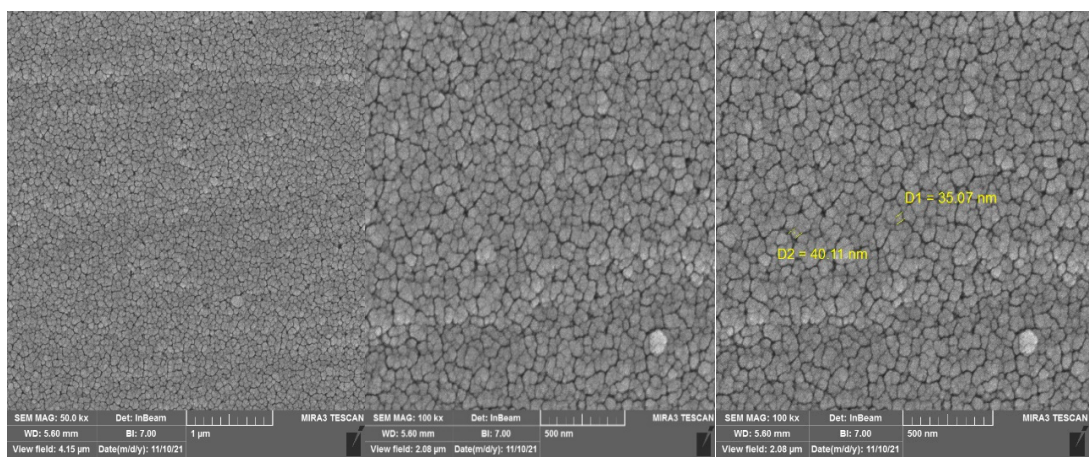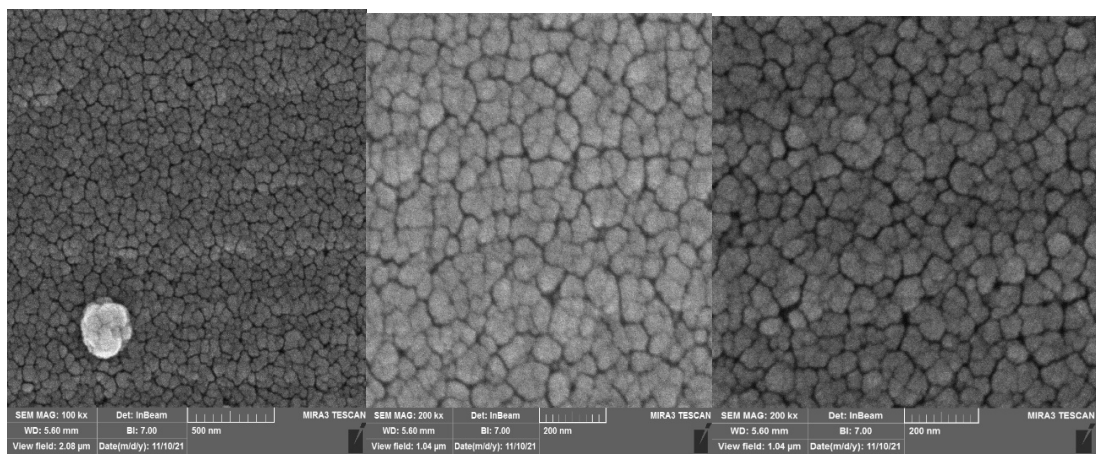

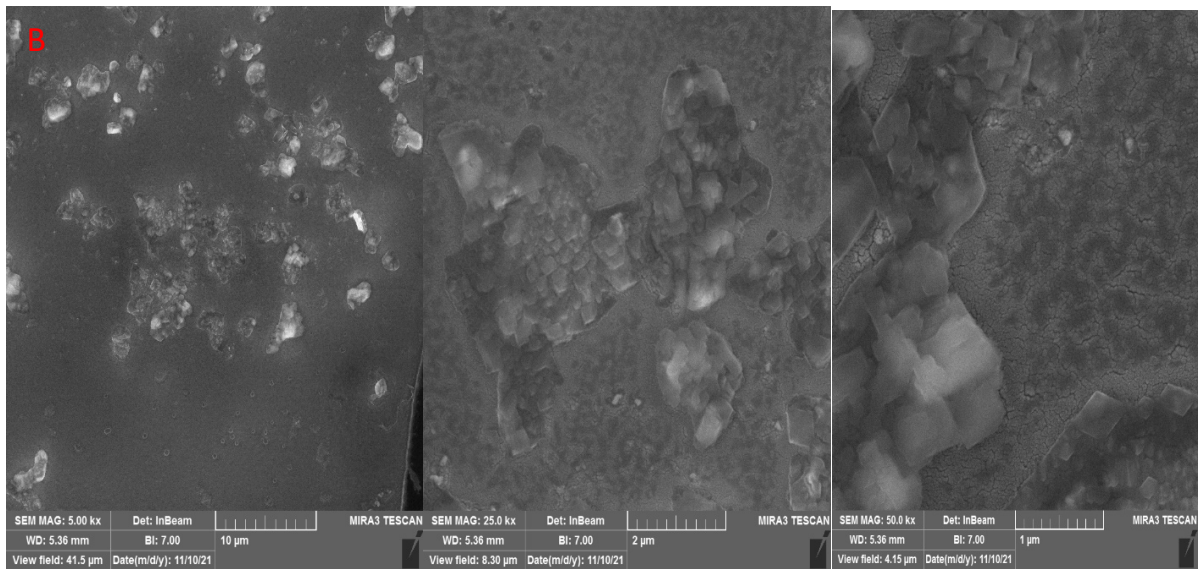

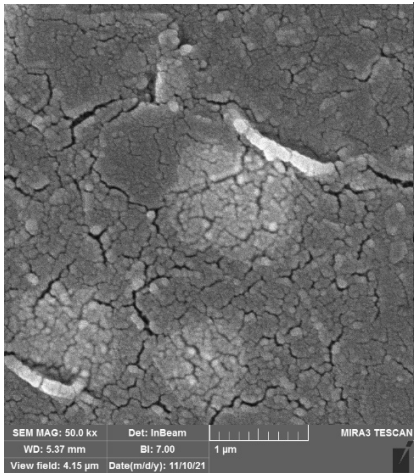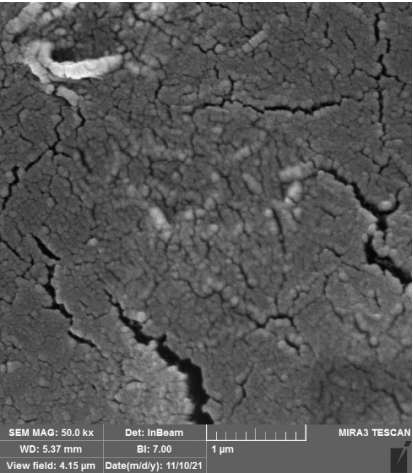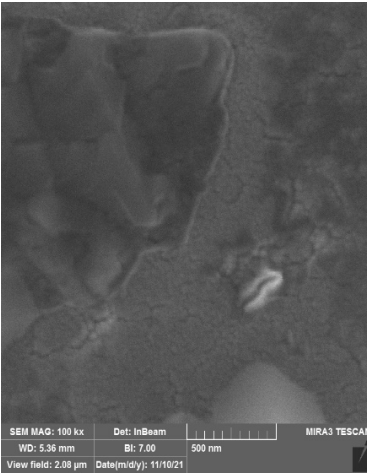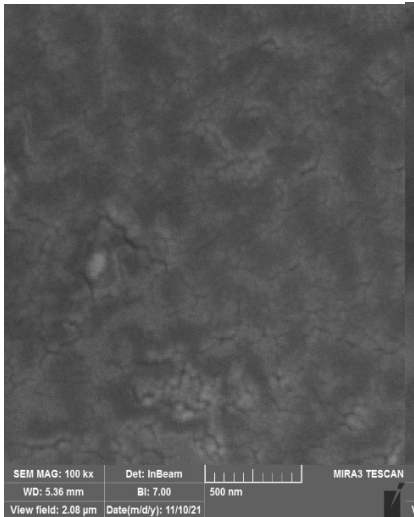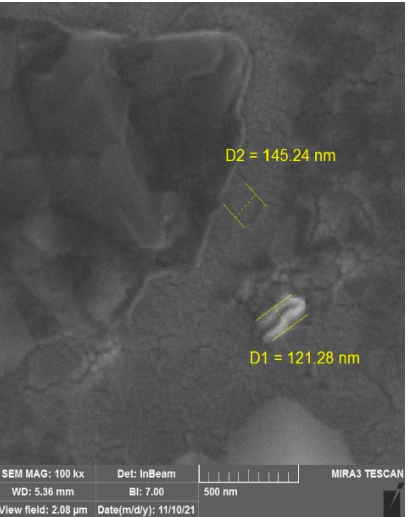



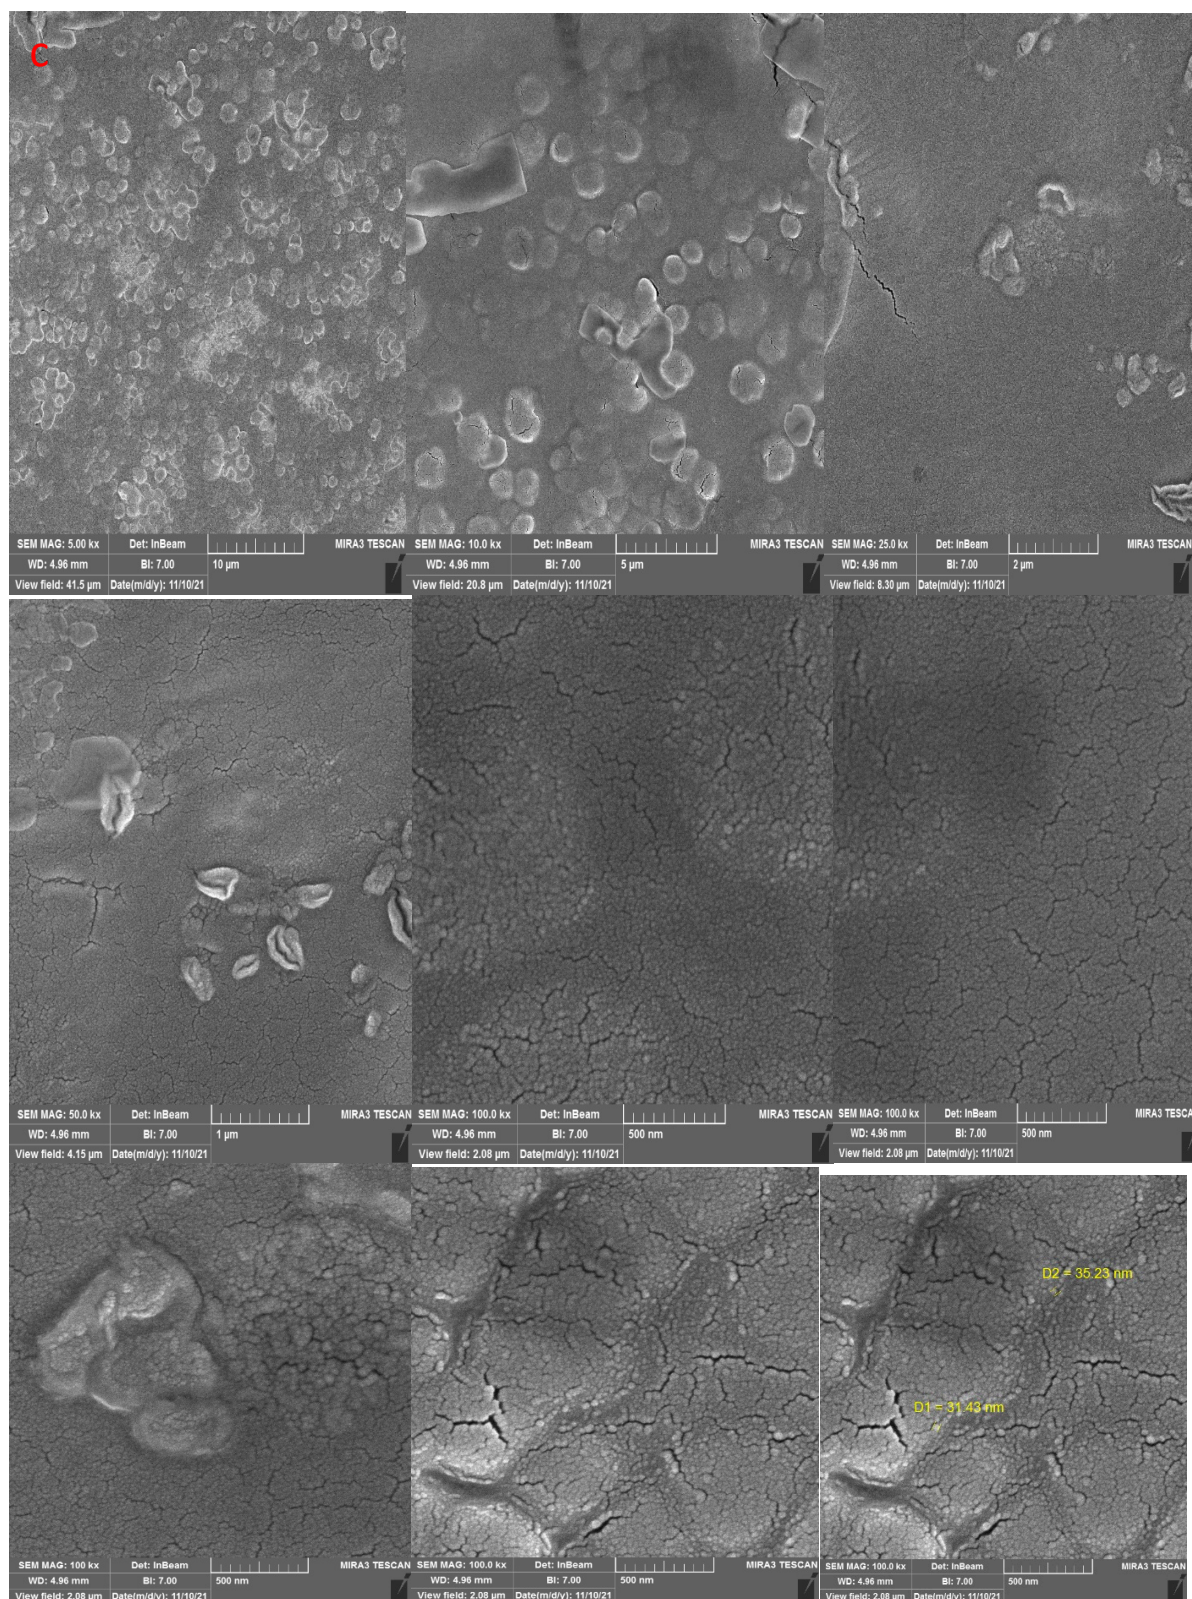

**Figure S5.** FE-SEM images of the sequential modified layers on GCE: A)  $\beta$ -CD, B)  $\beta$ -CD – KCC-1-NH-CS<sub>2</sub>-Ab C)  $\beta$ -CD – KCC-1-NH-CS<sub>2</sub>-Ab-BSA-Ag in different magnifications.



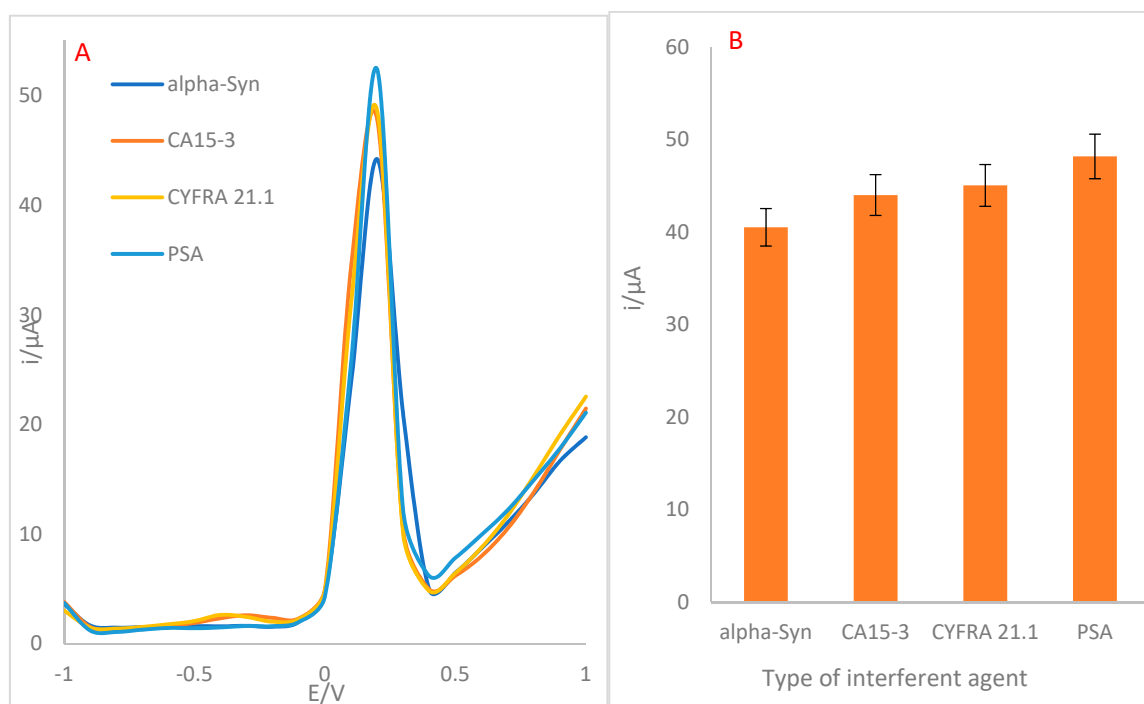

**Figure S6.** A) DPV of GCE- $\beta$ -CD-KCC-1-NH-CS<sub>2</sub>-Ab-BSA in the presence of  $\alpha$ -syn and three other interferences. The supporting electrolyte was 0.05 M solution [Fe (CN)<sub>6</sub>]<sup>3-/4-</sup>/KCl; the potential range was from -1 to 1. B) comparison of  $\alpha$ -syn and three other interferences peak current. (SD=2.28, n=4).

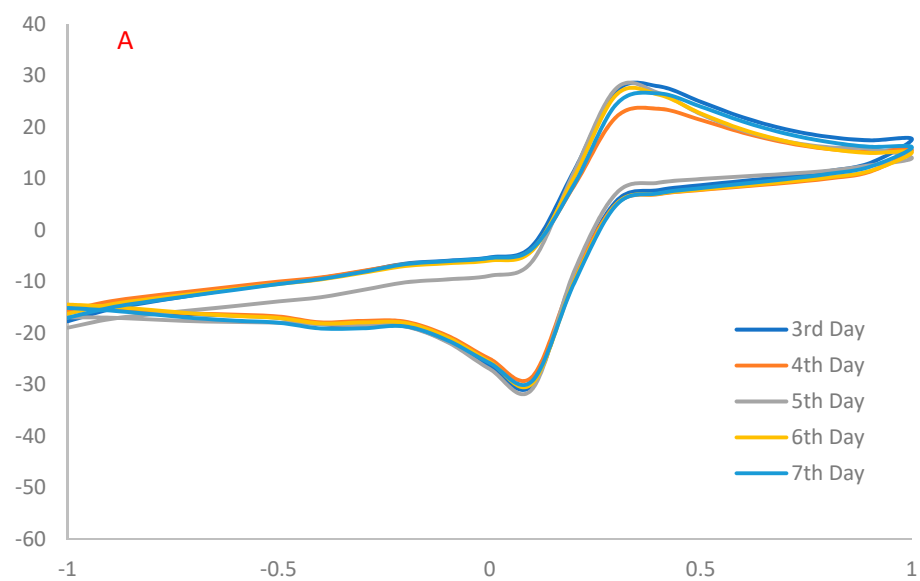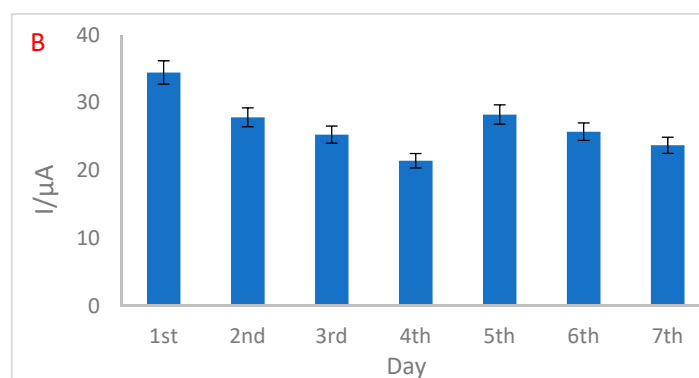

**Figure S7.** A) CV of GCE-P( $\beta$ -CD) in 7 consecutive days. B) Comparison of 7 consecutive days' peak current intensity for GCE-P( $\beta$ -CD) versus time of storage (SD=1.74, n=4).

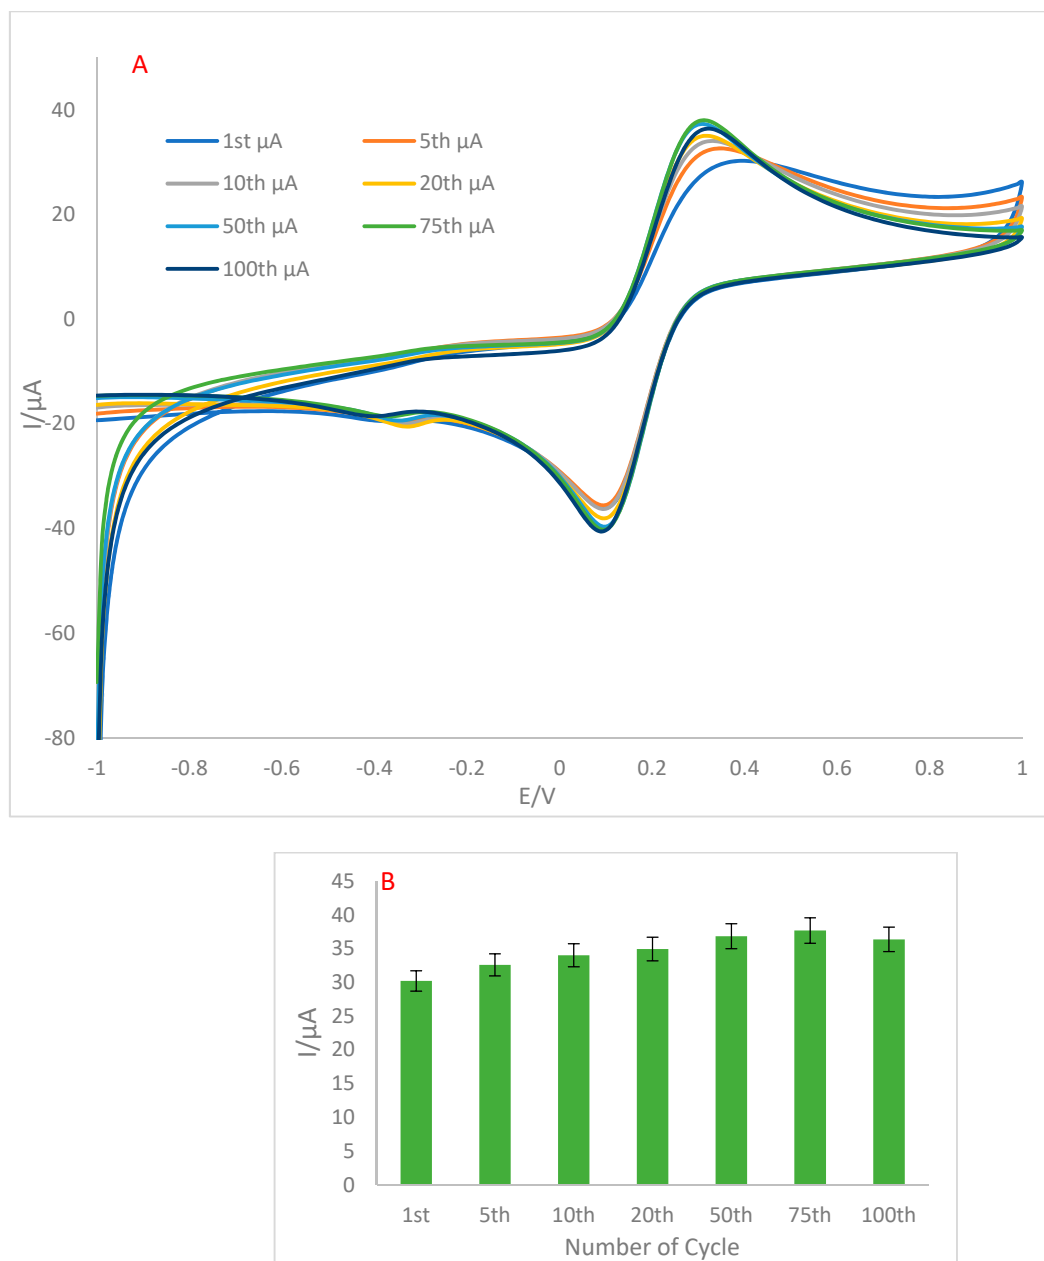

**Figure S8.** A) CV curves of GCE-P( $\beta$ -CD) for the 1<sup>st</sup>, 5<sup>th</sup>, 10<sup>th</sup>, 20<sup>th</sup>, 50<sup>th</sup>, 75<sup>th</sup>, and 100<sup>th</sup> cycles.

B) Dependency of peak currents versus the number of cycles (SD=1.95, n=4).



**Table S1.** Electrochemical parameters of GCE-P( $\beta$ -CD) and GCE (bare electrode).

| DATA             | GCE-P( $\beta$ -CD)                                               | GCE                                                                |
|------------------|-------------------------------------------------------------------|--------------------------------------------------------------------|
| $\alpha_n$       | 0.59                                                              | 0.33                                                               |
| D                | $3.16 \times 10^{-5} \text{ cm}^2 \text{ s}^{-1}$                 | $1.17 \times 10^{-6} \text{ cm}^2 \text{ s}^{-1}$                  |
| $A_{\text{eas}}$ | $9.05 \times 10^{-9} \text{ mol. cm}^{-2}$                        | $2.11 \times 10^{-10} \text{ mol. cm}^{-2}$                        |
| $k_0$            | $8.8 \times 10^{+5} \text{ cm}^3 \text{ mol}^{-1} \text{ s}^{-1}$ | $6.28 \times 10^{+4} \text{ cm}^3 \text{ mol}^{-1} \text{ s}^{-1}$ |

**Table S2.** Analytical parameters determined for calibration curves of  $\alpha$ -Syn using engineered immunosensor.

| Slop   | Intercept | R <sup>2</sup> | Linear range     | LLOQ       | Repeatability (RSD) | K <sub>D</sub> <sup>a</sup> (nM) |
|--------|-----------|----------------|------------------|------------|---------------------|----------------------------------|
| 0.0096 | 4.896     | 0.9836         | 0.02 to 64 ng/mL | 0.02 ng/mL | 1.49%               | 2.36                             |

<sup>a</sup> K<sub>D</sub> dissociation constant of antigen-antibody complexes.
